# Supplementary material
Source: HighWire-hosted journal article supplement (http://www.qdcxjkg.com/highwire/filestream/129362/field_highwire_adjunct_files/0/ERJ-01408-2015_Appendix_1.pdf)
Supplement: ERJ-01408-2015_Appendix_1.pdf [file ERJ-01408-2015_Appendix_1.pdf]

## Appendix 1: Population Characteristics – Accelerometry - Spirometry

### 1 **Recruitment and followup: GINIplus**

2 A detailed overview of the recruitment protocol for GINIPlus (“German Infant Study on  
3 the influence of Nutrition Intervention (Plus environmental and genetic influences) on allergy  
4 development”) is available at the study’s website [1] and has been published previously. [2-4]  
5 GINIplus is a population-based prospective birth cohort consisting of two arms: one  
6 interventional and one observational. GINIPlus15 is the 15-year followup.

7 5991 healthy, full-term newborns were recruited between September 1995 and June 1998  
8 (n=2949 in Munich, n=3042 in Wesel). Those with at least one parent or biological sibling with  
9 allergic disease were recruited for the nutritional intervention. 3739 unselected infants were  
10 recruited for the observational arm and given no formula (Figure 1a, Appendix 1). The  
11 intervention was a randomized, double-blind controlled trial of feeding with one of 3 hydrolysed  
12 formulas (partially or completely hydrolysed whey, or extensively hydrolysed casein: pHF-W,  
13 CHF-W, or eHF-C) versus cow’s milk formula (CMF) during first 4 months of life (n=1165 in  
14 Munich, n=1087 in Wesel). Details on randomization and blinding have been previously  
15 published.[3-6] Following current recommendations, breastfeeding was encouraged for all  
16 families including those children enrolled in the intervention arm.

17 Followups included physical examinations and personal interviews at 1, 4, 8, 12 , 24 and  
18 36 months, and at ages 6, 10 and 15; regular blood and urine tests for biomarkers; and  
19 questionnaires filled out by the child (age 10 and 15), the parents or both. For a detailed followup  
20 schedule see the website and previous publications. [2-4]

21 Attempts were made to contact each family by postal mail and telephone when the  
22 subject was 15 years old (Figure 1 main text). Of the 5991 infants recruited for GINIplus, 3199  
23 were successfully followed up by questionnaire and/or physical examination at age 15. The  
24 current study contains 655 children from GINIplus, of whom 49% received any intervention  
25 compared with only 38% of the original cohort. Since the intervention arm was restricted to  
26 children with a family history of allergic disease, this may represent ascertainment bias, greater  
27 health-consciousness, healthcare utilization or all of these.

## Appendix 1: Population Characteristics – Accelerometry - Spirometry

**Figure 1a: Recruitment and followup of GINIPlus**

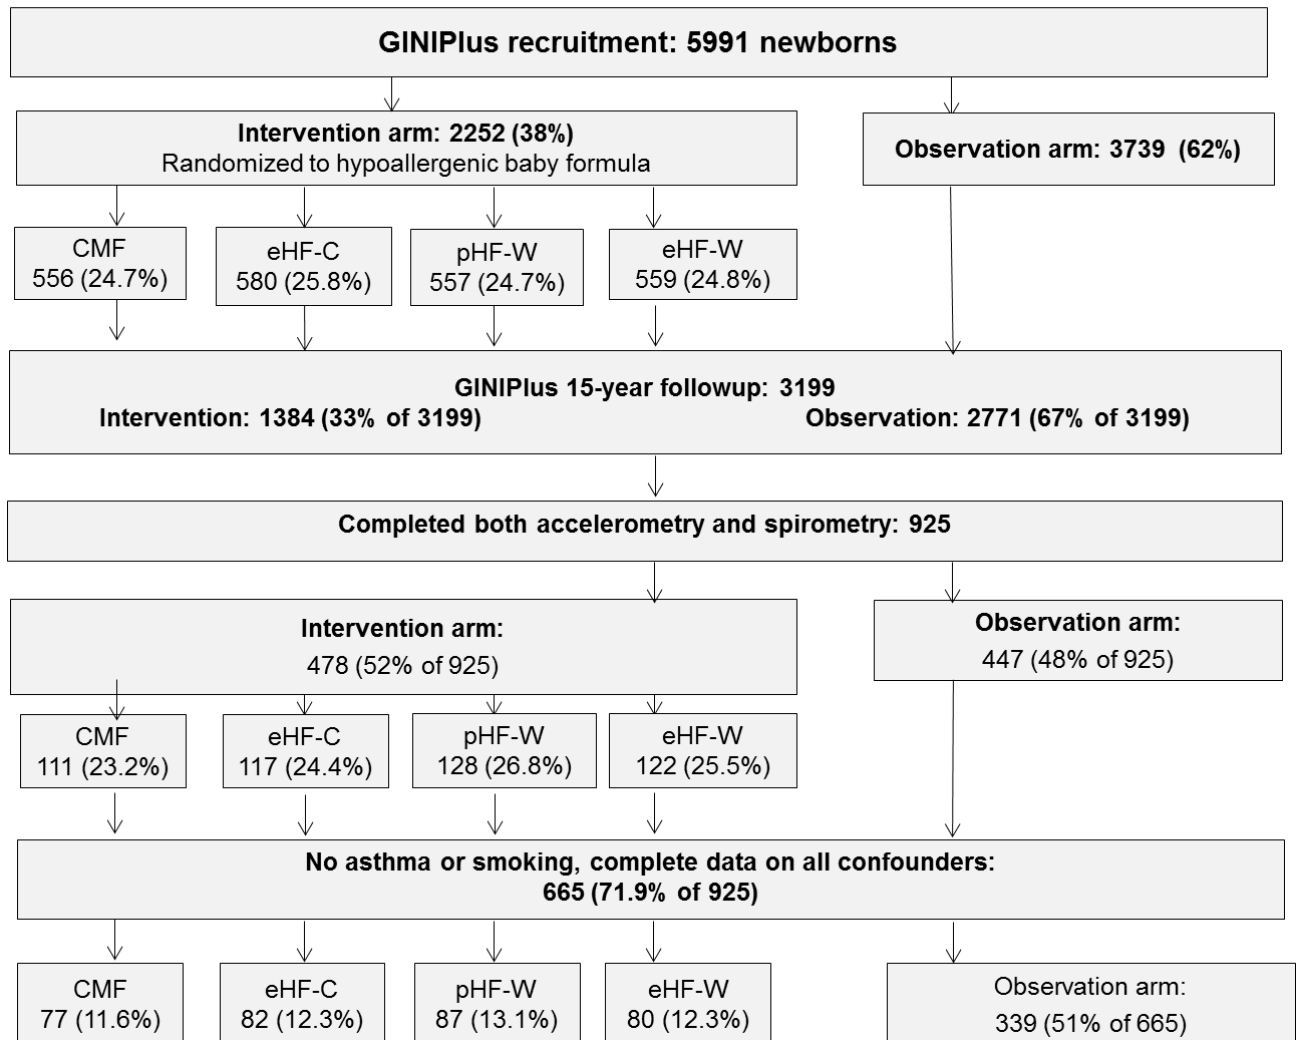

28

29

30

31

32

33

34

35

36

37

However, the four study formulas were present in roughly equal numbers in our subsample: the largest difference was for partially hydrolysed whey in girls. 26.4% of the study population that was given an intervention got pHF-W, compared with 24.7% of all GINIplus intervention subjects. This formula was not associated with asthma development [3] and thus differential exclusion due to asthma did not take place. We find that while our sample oversamples the intervention arm of GINIplus, there was no bias toward any specific formula.

## Appendix 1: Population Characteristics – Accelerometry - Spirometry

### 38 **Recruitment protocol: LISApplus**

39 A detailed overview of the recruitment and followup protocols for LISAPplus (Lifestyle-  
40 Immune System-Allergy: Influence of life-style factors on the development of the immune  
41 system and allergies in East and West Germany (Plus the influence of traffic emissions and  
42 genetics)) is available at the study's website [7] and has been published previously. [8-10]  
43 LISApplus is a prospective birth cohort in 4 regions of the former East and West Germany  
44 (Munich, Leipzig, Wesel, and Bad Honnef) instigated to examine the relationships between  
45 immune functioning and environmental and lifestyle exposures throughout life. No intervention,  
46 nutritional or other, was used in LISApplus.

47 3097 healthy, full-term newborns were recruited between November 1997 and January  
48 1999 (n= 1467 from Munich, 976 from Leipzig, 348 from Wesel, and 306 from Bad Honnef) of  
49 which 1534 (50%) were followed up at age 15; of these 1107 were from Munich (930) and  
50 Wesel (177). The current study samples only these children, since accelerometry was not offered  
51 to the study centers in Bad Honnef and Leipzig (Figure 1 main text).

52 Followups took place regularly on a similar schedule to that for GINIplus; for details see  
53 the website and previous publications. [8-10] Questionnaires were given monthly during the first  
54 year of life, every 6 months until age 2 years and thereafter at age 4, 6, 10 and 15 years, while  
55 medical examinations took place at ages 2, 6, 10 and 15. Data on biomarkers (blood and urine)  
56 were also collected but not used in the current study.

57

### 58 **Bias by Dropout**

59 Dropout was very similar between GINIplus and LISApplus Munich and Wesel at all  
60 stages of the study; see Figure 1 (main text) and Tables 1b and 1c, Appendix 1. Ultimately 13%  
61 of GINIplus and 11% of LISApplus Munich/Wesel was included in the statistical models. While  
62 there was no strong bias towards preferential dropout in our cohort compared to the rest of the  
63 15-year followup (Table 1b) the 15-year followup differed from the initial cohort with respect to  
64 contribution from Munich, education of the parents, and smoke exposure by the mother during  
65 and after pregnancy suggesting differential loss to followup (Table 1c.)

## Appendix 1: Population Characteristics – Accelerometry - Spirometry

### Table 1b: Study Population within GINplus and LISplus 15-Year Followup

|                                                                                                                                                                                                                                                                                                                                                                                                                                                                                                                                                                                                                                        | Study Population |               | GINplus15    |              | LISplus15    |               | P for selection (study population vs. all of 15-year followup) if <0.05 |       |
|----------------------------------------------------------------------------------------------------------------------------------------------------------------------------------------------------------------------------------------------------------------------------------------------------------------------------------------------------------------------------------------------------------------------------------------------------------------------------------------------------------------------------------------------------------------------------------------------------------------------------------------|------------------|---------------|--------------|--------------|--------------|---------------|-------------------------------------------------------------------------|-------|
| N, % of total                                                                                                                                                                                                                                                                                                                                                                                                                                                                                                                                                                                                                          | 895, 100         |               | 3199, 53     |              | 1107, 61     |               | --                                                                      |       |
| Age at exam                                                                                                                                                                                                                                                                                                                                                                                                                                                                                                                                                                                                                            | 15.2 (0.25)      | 15.2 (0.27)   | 15.3 (0.31)  | 15.3 (0.31)  | 15.1 (0.31)  | 15.2 (0.34)   | 0.002                                                                   | --    |
| Male (N, %)                                                                                                                                                                                                                                                                                                                                                                                                                                                                                                                                                                                                                            | 401, 45          |               | 1607, 50     |              | 591, 53      |               | <0.0001                                                                 |       |
| Height, cm                                                                                                                                                                                                                                                                                                                                                                                                                                                                                                                                                                                                                             | 176 (7.6)        | 167 (6.2)     | 177 (7.5)    | 167 (6.2)    | 176 (7.4)    | 166 (6.5)     | --                                                                      | --    |
| Weight, kg                                                                                                                                                                                                                                                                                                                                                                                                                                                                                                                                                                                                                             | 64.4 (12)        | 58.7 (9.6)    | 65.5 (13)    | 59.2 (10)    | 63.5 (12)    | 57.5 (9.6)    | --                                                                      | --    |
| BMI                                                                                                                                                                                                                                                                                                                                                                                                                                                                                                                                                                                                                                    | 20.6 (3.1)       | 20.9 (2.9)    | 20.9 (3.4)   | 21.1 (3.1)   | 20.5 (3.1)   | 20.7 (3.0)    | --                                                                      | --    |
| GINplus (%)                                                                                                                                                                                                                                                                                                                                                                                                                                                                                                                                                                                                                            | 74               | 76            | 100          | 100          | 0            | 0             | --                                                                      | --    |
| Nutritional intervention (%) <sup>2</sup><br>P for global null                                                                                                                                                                                                                                                                                                                                                                                                                                                                                                                                                                         |                  |               |              |              |              |               | --                                                                      | --    |
| CMF                                                                                                                                                                                                                                                                                                                                                                                                                                                                                                                                                                                                                                    | 7.98             | 9.11          | 11.0         | 9.99         | 0            | 0             | **                                                                      | **    |
| s1 pHF-W                                                                                                                                                                                                                                                                                                                                                                                                                                                                                                                                                                                                                               | 9.73             | 9.72          | 11.5         | 10.6         | 0            | 0             | **                                                                      | **    |
| s2 eHF-W                                                                                                                                                                                                                                                                                                                                                                                                                                                                                                                                                                                                                               | 9.73             | 8.30          | 11.1         | 10.7         | 0            | 0             | **                                                                      | **    |
| s3 eHF-C                                                                                                                                                                                                                                                                                                                                                                                                                                                                                                                                                                                                                               | 8.48             | 9.72          | 10.6         | 11.1         | 0            | 0             | **                                                                      | **    |
| None (control)                                                                                                                                                                                                                                                                                                                                                                                                                                                                                                                                                                                                                         | 64.1             | 63.2          | 55.8         | 57.7         | 100          | 100           | **                                                                      | **    |
| FEV1 z-score                                                                                                                                                                                                                                                                                                                                                                                                                                                                                                                                                                                                                           | -0.55 (0.99)     | -0.48 (0.91)  | -0.62 (0.96) | -0.53 (0.88) | -0.46 (1.0)  | -0.44 (0.92)  | --                                                                      | --    |
| FVC z-score                                                                                                                                                                                                                                                                                                                                                                                                                                                                                                                                                                                                                            | -0.56 (0.95)     | -0.43 (0.91)  | -0.59 (0.93) | -0.47 (0.88) | -0.44 (1.0)  | -0.39 (0.95)  | --                                                                      | --    |
| FEV1/FVC z-score                                                                                                                                                                                                                                                                                                                                                                                                                                                                                                                                                                                                                       | -0.06 (0.94)     | -0.075 (0.96) | -0.11 (1.0)  | -0.10 (1.0)  | -0.072 (1.0) | -0.088 (0.92) | --                                                                      | --    |
| Daily minutes MVPA                                                                                                                                                                                                                                                                                                                                                                                                                                                                                                                                                                                                                     | 44.9 (21)        | 35.6 (19)     | 43.8 (21)    | 37.5 (23)    | 49.9 (25)    | 38.0 (21)     | --                                                                      | 0.021 |
| Any leisure sport (%)                                                                                                                                                                                                                                                                                                                                                                                                                                                                                                                                                                                                                  | 77               | 80            | 76           | 79           | 76           | 81            | --                                                                      | --    |
| Asthma at age 15 (%)                                                                                                                                                                                                                                                                                                                                                                                                                                                                                                                                                                                                                   |                  |               |              |              |              |               |                                                                         |       |
| Confirmed                                                                                                                                                                                                                                                                                                                                                                                                                                                                                                                                                                                                                              | 0                | 0             | 3.38         | 2.54         | 3.88         | 2.33          | *                                                                       | *     |
| Denied                                                                                                                                                                                                                                                                                                                                                                                                                                                                                                                                                                                                                                 | 100              | 100           | 49.8         | 52.9         | 57.6         | 57.2          | *                                                                       | *     |
| Missing data                                                                                                                                                                                                                                                                                                                                                                                                                                                                                                                                                                                                                           | 0                | 0             | 46.8         | 44.6         | 38.6         | 40.4          | *                                                                       | *     |
| Smoking at age 15 (%)                                                                                                                                                                                                                                                                                                                                                                                                                                                                                                                                                                                                                  |                  |               |              |              |              |               |                                                                         |       |
| Confirmed                                                                                                                                                                                                                                                                                                                                                                                                                                                                                                                                                                                                                              | 0                | 0             | 4.6          | 4.5          | 6.0          | 6.0           | *                                                                       | *     |
| Denied                                                                                                                                                                                                                                                                                                                                                                                                                                                                                                                                                                                                                                 | 100              | 100           | 75           | 81           | 90           | 87            | *                                                                       | *     |
| Missing data                                                                                                                                                                                                                                                                                                                                                                                                                                                                                                                                                                                                                           | 0                | 0             | 20           | 15           | 4.2          | 6.6           | *                                                                       | *     |
| Completed a physical exam                                                                                                                                                                                                                                                                                                                                                                                                                                                                                                                                                                                                              | 100              | 100           | 61           | 65           | 58           | 61            | *                                                                       | *     |
| Valid accelerometry                                                                                                                                                                                                                                                                                                                                                                                                                                                                                                                                                                                                                    | 100              | 100           | 30           | 36           | 30           | 34            | *                                                                       | *     |
| Valid spirometry                                                                                                                                                                                                                                                                                                                                                                                                                                                                                                                                                                                                                       | 100              | 100           | 54           | 60           | 50           | 52            | *                                                                       | *     |
| P-value from unequal-variance T-test for normally distributed variables (spirometric z-scores); Kruskal-Wallis test for categorical variables (nutritional intervention global null hypothesis); Wilcoxon's two-tailed rank-sum test for binary and otherwise non-normal variables (all others.)<br>* if p-value not given because characteristic was used for inclusion,<br>** if pairwise comparison inappropriate (see global null),<br>-- if p>0.05<br>Moderate, vigorous and moderate-to-vigorous PA (MVPA) imputed for diaried nonwear time due to sport. Accelerometric cutpoints from [11, 12]. Spirometric z-scores from [13] |                  |               |              |              |              |               |                                                                         |       |

## Appendix 1: Population Characteristics – Accelerometry - Spirometry

67

68

| <b>Table 1c: Study Population within GINIplus and LISAplus at Birth</b> |                  |            |                            |             |                            |            |                                                                                           |         |
|-------------------------------------------------------------------------|------------------|------------|----------------------------|-------------|----------------------------|------------|-------------------------------------------------------------------------------------------|---------|
|                                                                         | Study population |            | GINIplus: Munich and Wesel |             | LISAplus: Munich and Wesel |            | P for selection (study population vs. all of GINILISA Munich and Wesel at birth) if <0.05 |         |
|                                                                         | Boys             | Girls      | Boys                       | Girls       | Boys                       | Girls      | Boys                                                                                      | Girls   |
| N                                                                       | 895              |            | 5991                       |             | 1812                       |            | --                                                                                        | --      |
| Male (N, %)                                                             | 401, 45          |            | 2991, 51                   |             | 954, 53                    |            | <0.0001                                                                                   |         |
| Birthdate                                                               | 3 July 1997      | 7 May 1997 | 18 Nov 1996                | 21 Nov 1996 | 2 Aug 1998                 | 3 Aug 1998 | <0.0001                                                                                   | 0.033   |
| Parents highly educated <sup>1</sup> (%)                                | 68               | 70         | 59                         | 63          | 76                         | 74         | 0.033                                                                                     | 0.025   |
| Study center Munich (%)                                                 | 61               | 54         | 49                         | 48          | 81                         | 81         | 0.041                                                                                     | --      |
| Nutritional intervention (%) <sup>2</sup>                               |                  |            |                            |             |                            |            | <0.0001                                                                                   | <0.0001 |
| P for global null                                                       |                  |            |                            |             |                            |            | <0.0001                                                                                   | <0.0001 |
| CMF                                                                     | 7.98             | 9.11       | 9.80                       | 9.26        | 0                          | 0          | **                                                                                        | **      |
| s1 pHF-W                                                                | 9.73             | 9.72       | 9.70                       | 9.40        | 0                          | 0          | **                                                                                        | **      |
| s2 eHF-W                                                                | 9.73             | 8.30       | 9.70                       | 9.48        | 0                          | 0          | **                                                                                        | **      |
| s3 eHF-C                                                                | 8.48             | 9.72       | 10.0                       | 9.86        | 0                          | 0          | **                                                                                        | **      |
| None                                                                    | 64.1             | 63.2       | 60.8                       | 62.0        | 100                        | 100        | **                                                                                        | **      |
| Birthweight (g)                                                         | 3526 (443)       | 3422 (451) | 3,544 (478)                | 3,393 (439) | 3,513 (437)                | 3395 (428) | --                                                                                        | --      |
| Exclusively breastfed (%)                                               |                  |            |                            |             |                            |            | <0.0001                                                                                   | <0.0001 |
| P for global null                                                       |                  |            |                            |             |                            |            | <0.0001                                                                                   | <0.0001 |
| Never                                                                   | 34.7             | 35.2       | 48.3                       | 45.1        | 38.6                       | 38.3       | **                                                                                        | **      |
| Months 1-4 only                                                         | 10.2             | 9.11       | 9.05                       | 10.8        | 11.9                       | 11.3       | **                                                                                        | **      |
| Past month 4                                                            | 55.1             | 55.7       | 42.7                       | 44.1        | 49.4                       | 50.3       | **                                                                                        | **      |
| Mother smoked tobacco when pregnant                                     | 9.47             | 10.3       | 17.3                       | 18.2        | 15.5                       | 16.2       | <0.0001                                                                                   | <0.0001 |
| Tobacco smoke at home up to age 6                                       | 30.9             | 30.4       | 35.4                       | 34.3        | 42.5                       | 44.1       | 0.071                                                                                     | 0.0021  |

GINIplus = German Infant Study on the influence of Nutrition Intervention (Plus environmental and genetic influences) on allergy development; LISAplus = Lifestyle-Immune System-Allergy: Influence of life-style factors on the development of the immune system and allergies in East and West Germany (Plus the influence of traffic emissions and genetics.)  
 For details see paper or [2-4] for GINIplus, [7, 8, 10] for LISAplus.  
 1) Parents highly educated= at least one parent entered university  
 2) CMF=cows' milk formula, pHF-W= partially hydrolysed whey formula, eHF-W=extensively hydrolysed whey formula, eHF-C=extensively hydrolysed casein formula, None=no formula given. For details on formulas, selection and randomization see [2] and [3]  
 P-value from unequal-variance T-test for normally distributed variables (birthweight); Kruskal-Wallis test for categorical variables (nutritional intervention, breastfeeding duration global null hypothesis); Wilcoxon's two-tailed rank-sum test for binary and otherwise non-normal variables (all others.)  
 --if p>0.05.  
 \*\* if pairwise comparison inappropriate (see global null), -- if p>0.05

## Appendix 1: Population Characteristics – Accelerometry - Spirometry

### 69 Accelerometric protocol

70 This study followed the same protocol as Smith and Schulz [14] and Pfitzner et al. [15]  
 71 each of which profiled subsets of GINIplus. Triaxial accelerometers (ActiGraph GT3X,  
 72 Pensacola, Florida) were worn on the dominant hip for up to 7 days, after which device and diary  
 73 were returned by mail. After consenting to accelerometry, subjects were mailed a package which  
 74 contained the device, a pre-printed diary with instructions for filling it in and sample of proper  
 75 methods, ([15] Figure S2) and a stamped, self-addressed envelope for returning monitors after  
 76 one week of PA measurement.

77

**Figure 1b: Accelerometry Response Rate**

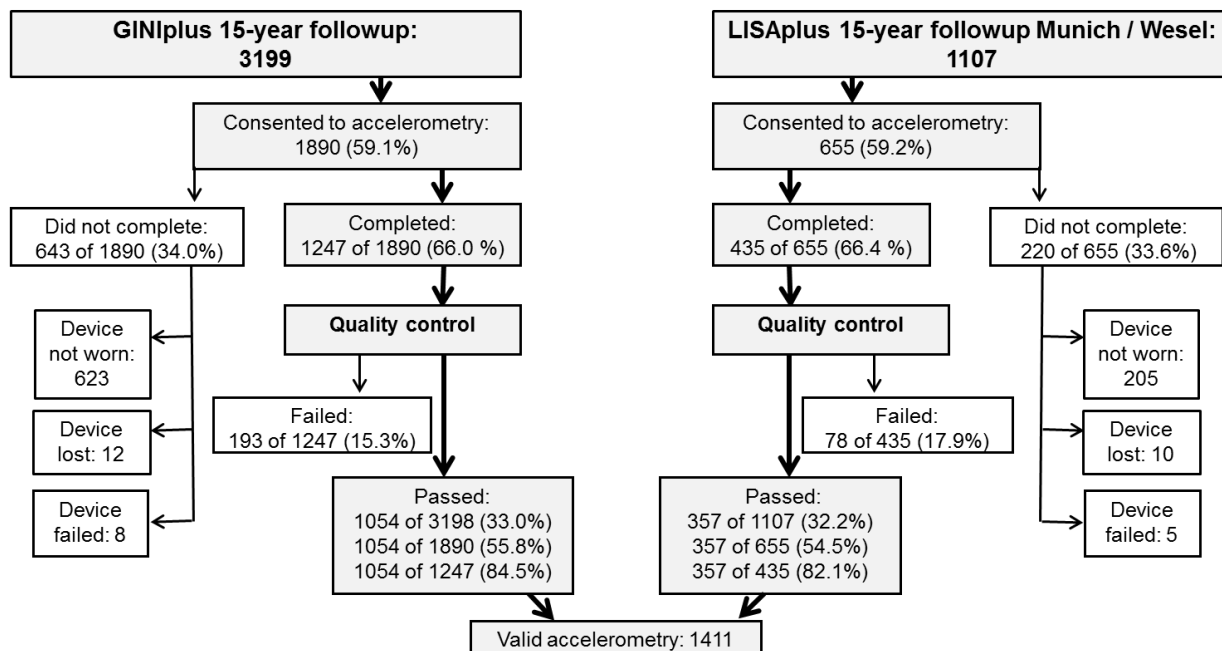

78

79 *Activity Diary:* Subjects documented each of the following events as close as possible to the time  
 80 they occurred: time of waking up and going to bed; time and reason for removing one or both  
 81 monitors (non-wear time) such as for showering or swimming; time and method of travel to and  
 82 from school; time of starting and finishing school; time of starting and finishing school sport;  
 83 and time and type of leisure-time sporting activity. Since school sport is mandatory in Germany,  
 84 we considered only leisure-time sport as an indicator of active lifestyle in the current study.

85

## Appendix 1: Population Characteristics – Accelerometry - Spirometry

86 *Validation of days:* Of a total 11,572 recorded days, 2740 (17.1%) were invalid. Most invalid  
87 days (1140, 58%) were the result of inconsistency between the diary and the NHANES wear time  
88 criteria, reflecting our high standard of data cleaning and suggesting a relatively accurate  
89 allocation of activity on the days that passed quality control. Other reasons included non-wear  
90 time issues (526 days, 26.7%), and technical issues (145 days, 7.4%). Many days were invalid  
91 for more than one reason. In addition, 271 days were excluded because the subject did not have  
92 at least 3 valid weekdays and one valid weekend day.

93

94 *Validation of subjects:* Subjects were required to have at least one valid weekend day of  
95 recording in addition to at least three valid weekdays. Days were required to have at least 10  
96 hours of valid recording time to be considered valid, or as little as 7 hours if subjects were awake  
97 for less than 10 hours. (Figure 1b above)

98

99 *Data Management and Quality Control:* Sampling rate was set to 30 Hz and the measured  
100 accelerations stored at 1 Hz after conversion into activity counts. Activity counts of the vertical  
101 axis were assigned to the four intensity levels—sedentary, light, moderate, and vigorous physical  
102 activity—using Freedson’s commonly-used cutpoints. [11, 12] Diary information was digitized  
103 using a 7-day template and reviewed by a second study assistant to avoid transcription errors.

104

### 105 **Spirometric protocol**

106 Spirometry was performed at the 15-year followup physical examinations for GINIplus  
107 and LISApplus. Measurements were performed in line with ATS/ERS recommendations (Miller et  
108 al, 2005[16]) using a pneumotachograph-type spirometer (EasyOne Worldspirometer, ndd,  
109 Zurich, Switzerland), calibrated daily before spirometry with a 3-L calibration pump supplied by  
110 the manufacturer.

111 Subjects were seated while wearing nose clips. They performed at least three but not  
112 more than eight trials per test under the guidance of trained and experienced examiners in order  
113 to obtain optimal flow-volume curves. Both flow-volume and volume-time curves were  
114 monitored by the examiner and visible to the participant to enable guided support of the  
115 participant.

## Appendix 1: Population Characteristics – Accelerometry - Spirometry

116 Based on ATS/ERS acceptability criteria[16] and as recommended by [17] all tests were  
117 visually inspected by physicians to exclude manoeuvres performed incorrectly or with artefacts.  
118 Spirometric indices were taken from the best manoeuvre with the largest sum of FEV1 and FVC.  
119 Further parameters evaluated were the ratio of FEV1 and FVC (FEV1/FVC), peak expiratory  
120 flow (PEF), forced expiratory flow rates at 25, 50 and 75% of exhaled FVC (FEF25, FEF50 and  
121 FEF75) and the mean flow rate between 25 and 75% of FVC (FEF2575). In total, 2878 subjects  
122 from GINIplus and LISApplus underwent spirometry, of whom 2757 (96%) passed quality control  
123

### 124 Comparison of Spirometric Z-scores: GLI vs. LUNOKID

125 Z-scores were calculated for our study population from two different reference equations:  
126 those published by the Global Lung Initiative [13] and those published by the LUNOKID study  
127 of Germans.[18] Although the GLI values were consistently lower than those for LUNOKID, the  
128 correlation between the two was very strong (over 99% of variance explained; see Table 1d  
129 below.)  
130  
131

132

| Table 1d: Comparison of Z-Scores  |              |               |                                             |
|-----------------------------------|--------------|---------------|---------------------------------------------|
| Mean (SD): expected value is 0(1) |              |               |                                             |
| Index                             | LUNOKID[18]  | GLI [13]      | Pearson correlation between LUNOKID and GLI |
| FEV1                              | 0.109 (1.2)  | -0.510 (0.94) | 0.996                                       |
| FVC                               | -0.020 (1.2) | -0.489 (0.93) | 0.997                                       |
| FEV1/FVC                          | 0.244 (1.2)  | -0.069 (0.95) | 0.997                                       |

133  
134  
135  
136  
137  
138  
139

GLI z-scores from [13]; LUNOKID z-scores from [18]

140 **Final study population:** 1196 subjects had complete accelerometry and spirometry (Figure 1  
141 main text), of which 1102 (92%) confirmed no asthma. Of these, 1011 confirmed abstinence  
142 from tobacco. Only complete cases were analysed, but missing data were uncommon. Of the  
143 1011, 895 (89%) were missing no confounder and thus were included in the models.  
144



## Appendix 1: Population Characteristics – Accelerometry - Spirometry

### 145 References

- 146 1. GINIPlus Study Website. [cited; Available from: [https://www.helmholtz-  
muenchen.de/en/epi1/research/research-units/research-unit-1-environmental-  
epidemiology/projects/giniplus/index.html](https://www.helmholtz-<br/>147 muenchen.de/en/epi1/research/research-units/research-unit-1-environmental-<br/>148 epidemiology/projects/giniplus/index.html)]
- 149 2. Heinrich J; Brüske, I; Schnappinger, M; Standl, M; Flexeder, C; Thiering, E; Tischer, C;  
150 Tiesler, CMT; Kohlböck, G; Little, CM; Bauer, CP; Schaaf, B; von Berg, A; Berdel, D;  
151 Krämer, U; Cramer, C; Lehmann, I; Herbarth, O; Behrendt, H. German Interventional and  
152 Nutritional Study. Helmholtz Zentrum Muenchen, Institut für Epidemiologie I.
- 153 3. von Berg A; Filipiak-Pittroff, B; Hoffmann, U; Link, E; Sussman, M; Schnappinger, M;  
154 Brüske, I; Standl, M; Kramer, U; Hoffmann, B; Heinrich, J; Bauer, CP; Koletzko, S; Berdel, D;  
155 German Infant Nutritional Intervention Study Group. Allergic manifestation 15 years after early  
156 intervention with hydrolyzed formulas--the GINI Study. *Allergy* 2015.
- 157 4. von Berg A; Kramer, U; Link, E; Bollrath, C; Heinrich, J; Brockow, I; Koletzko, I;  
158 Grubl, A; Filipiak-Pittroff, B; Wichmann, HE; Bauer, CP; Reinhardt, D; Berdel, D; GINIplus  
159 study group. Impact of early feeding on childhood eczema: development after nutritional  
160 intervention compared with the natural course – the GINIplus study up to the age of 6 years.  
161 *Clinical & Experimental Allergy* 2010; 40(4): 627-636.
- 162 5. von Berg A; Koletzko, S; Gröbl, A; Filipiak-Pittroff, B; Wichmann, HE; Bauer, CP;  
163 Reinhardt, D; Berdel, D; German Infant Nutritional Intervention Study Group. The effect of  
164 hydrolyzed cow's milk formula for allergy prevention in the first year of life: the German Infant  
165 Nutritional Intervention Study, a randomized double-blind trial. *Journal of Allergy and Clinical  
166 Immunology* 2003; 111(3): 533-540.
- 167 6. von Berg A; Koletzko, S; Filipiak-Pittroff, B; Laubereau, B; Gröbl, A; Wichmann, HE;  
168 Bauer, CP; Reinhardt, D; Berdel, D; German Infant Nutritional Intervention Study Group.  
169 Certain hydrolyzed formulas reduce the incidence of atopic dermatitis but not that of asthma:  
170 three-year results of the German Infant Nutritional Intervention Study. *J Allergy Clin Immunol*  
171 2007; 119(3): 718-725.
- 172 7. LISA Study Website. [cited 20/11/2015]; Available from: [https://www.helmholtz-  
muenchen.de/epi1/forschung/arbeitsgruppen/arbeitsgruppe-1-umweltepidemiologie/projekte/lisa-  
plus/index.html](https://www.helmholtz-<br/>173 muenchen.de/epi1/forschung/arbeitsgruppen/arbeitsgruppe-1-umweltepidemiologie/projekte/lisa-<br/>174 plus/index.html)]
- 175 8. Chen CM; Rzehak, P; Zutavern, A; Fahlbusch, B; Bischof, W; Herbarth, O; Borte, M;  
176 Lehmann, I; Behrendt, H; Krämer, U; Wichmann, HE; Heinrich, J; LISA Study Group.  
177 Longitudinal study on cat allergen exposure and the development of allergy in young children  
178 *Journal of Allergy and Clinical Immunology* 2007; 119(5): 1148–1155.
- 179 9. Fuertes E; Bracher, J; Flexeder, C; Markevych, I; Klümper, C; Hoffmann, B; Krämer, U;  
180 von Berg, A; Bauer, CP; Koletzko, S; Berdel, D; Heinrich, J; Schulz, H. Long-term air pollution  
181 exposure and lung function in 15 year-old adolescents living in an urban and rural area in  
182 Germany: The GINIplus and LISApplus cohorts. *Int J Hyg Environ Health* 2015; 218(7): 656-  
183 665.
- 184 10. Heinrich J; Brüske, I; Schnappinger, M; Standl, M; Flexeder, C; Thiering, E; Tischer, C;  
185 Tiesler, CMT; Kohlböck, G; Little, CM; Bauer, CP; Schaaf, B; von Berg, A; Berdel, D;  
186 Krämer, U; Cramer, C; Lehmann, I; Herbarth, O; Behrendt, H. LISApplus: Influence of life-style  
187 factors on the development of the immune system and allergies in East and West Germany Plus

## Appendix 1: Population Characteristics – Accelerometry - Spirometry

- 188 the influence of traffic emissions and genetics. Institut für Epidemiologie I: Helmholtz Zentrum  
189 Muenchen; Deutsches Forschungszentrum für Gesundheit und Umwelt (GmbH); Germany.
- 190 11. Freedson P; Pober, D; Janz, KF Calibration of accelerometer output for children.  
191 *Medicine and Science in Sports and Exercise* 2005; 37(11(Suppl)): 523-530.
- 192 12. Trost SG; Loprinzi, PD; Moore, R Pfeiffer, KA. Comparison of accelerometer cut points  
193 for predicting activity intensity in youth. *Med Sci Sports Exerc* 2010; 43(7): 1360-1368.
- 194 13. Quanjer PH; Stanojevic, S; Stocks, J; Cole, TJ. GLI-2012 : All-Age Multi-Ethnic  
195 Reference Values for Spirometry. Global Lung Initiative, 2012.
- 196 14. Smith MP; Berdel, D; Nowak, D; Heinrich, J; Schulz, H. Sport Engagement by  
197 Accelerometry under Field Conditions in German Adolescents: Results from GINIPlus. *PLOS*  
198 *ONE* 2015; 10(8).
- 199 15. Pfitzner R; Gorzelniak, L; Heinrich, J; von Berg, A; Klümper, C; Bauer, CP; Koletzko, S;  
200 Berdel, D; Horsch, A; Schulz, Holger. Physical Activity in German Adolescents Measured by  
201 Accelerometry and Activity Diary: Introducing a Comprehensive Approach for Data  
202 Management and Preliminary Results. *PLOS ONE* 2013.
- 203 16. Miller MR; Hankinson, J; Brusasco, V; Burgos, F; Casaburi, R; Coates, A; Crapo, R;  
204 Enright, P; van der Grinten, CPM; Gustafsson, P; Jensen, R; Johnson, DC; MacIntyre, N;  
205 McKay, R; Navajas, D; Pedersen, OF; Pellegrino, R; Viegi, G; Wanger, J. Standardisation of  
206 spirometry. *European Respiratory Journal* 2005; 26 319–338.
- 207 17. Müller-Brandes C; Krämer, U; Gappa, M; Seitner-Sorge, G; Hüls, A; von Berg, A;  
208 Hoffmann, B; Schuster, A; Illi, S; Wisbauer, M; Berdel, D. LUNOKID: can numerical American  
209 Thoracic Society/European Respiratory Society quality criteria replace visual inspection of  
210 spirometry? *Eur Respir J* 2014; 43(5): 1347-1356.
- 211 18. Hüls A; Krämer, U; Gappa, M; Müller-Brandes, C; Seitner-Sorge, G, von Berg, A;  
212 Schuster, A; Beckmann, C; Illi, S; Wisbauer, M; Berdel, D. New spirometric reference values for  
213 children and adolescents in Germany considering height and non-linear age effects: the  
214 LUNOKID-study. *Pneumologie* 2013; 67(3): 141-149.

215
